# Supplementary material for: Cannabidiol potentiates p53-driven autophagic cell death in non-small cell lung cancer following DNA damage: a novel synergistic approach beyond canonical pathways
Source: Springer Nature journal article supplement (doi:10.1038/s12276-025-01444-x), 2025-05-01
Supplement: MOESM1 [file 12276_2025_1444_MOESM1_ESM.pdf]

# **Cannabidiol Potentiates p53-Driven Autophagic Cell Death in Non-Small Cell Lung Cancer Following DNA Damage: A Novel Synergistic Approach Beyond Canonical Pathways**

Youngsic Jeon<sup>1,†</sup>, Taejung Kim<sup>1,2,†</sup>, Hyukjoon Kwon<sup>1</sup>, Young Nyun Park<sup>3</sup>, Tae-Hyung Kwon<sup>4</sup>, Min Hong<sup>4</sup>, Kyung-Chul Choi<sup>5,\*</sup>, Jungyeob Ham<sup>1,2,6,\*</sup>, and Young-Joo Kim<sup>1,\*</sup>

## **Author Affiliations:**

<sup>1</sup> Institute of Natural Products, Korea Institute of Science and Technology, Republic of Korea

<sup>2</sup> Natural Product Applied Science, KIST School, University of Science and Technology, Republic of Korea

<sup>3</sup> Department of Pathology, Graduate School of Medical Science, Brain Korea 21 Project, Yonsei University College of Medicine, Republic of Korea

<sup>4</sup> Institute of Biological Resources, Chuncheon Bioindustry Foundation, Republic of Korea

<sup>5</sup> Department of Biochemistry and Molecular Biology, Brain Korea 21 project, Asan Medical Center, University of Ulsan College of Medicine, Republic of Korea

<sup>6</sup> NeoCannBio Co., Ltd., Republic of Korea

†Youngsic Jeon and Taejung Kim contributed equally to this work.

## Supplementary Figures

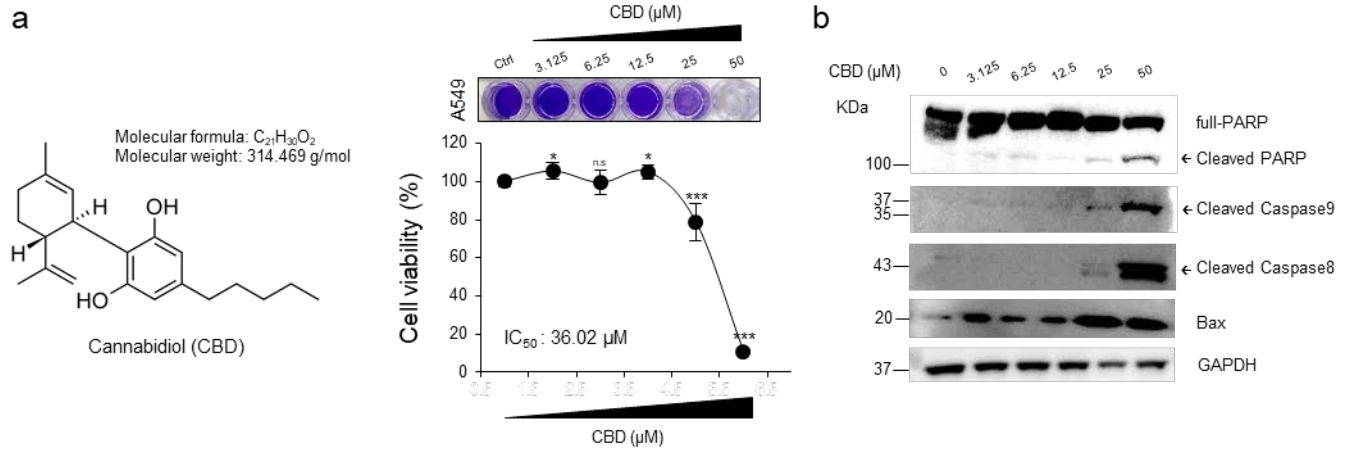

**Supplementary Fig. 1 Low concentrations of CBD do not induce cell death in A539 cells. (a)** Chemical structure of CBD (*left*). Cell viability is shown with a point plot at the indicated dose in A549 cells for 48 h (*right*). **(b)** Expression levels of cleaved PARP, caspases 8 and 9, and Bax are evaluated by Western blot. Protein levels are normalized to those of GAPDH.

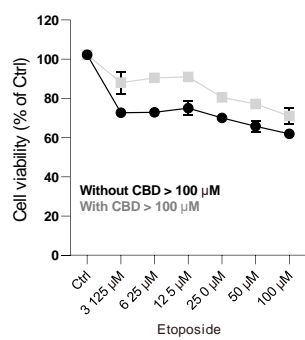

**Supplementary Fig. 2 Assessment of combination treatment efficacy using WST-8 assay on normal lung fibroblast cells.**

A plot shows the cell viability of HEL299 cells treated with etoposide, with or without CBD, for 48 h. IC<sub>50</sub> values are indicated.

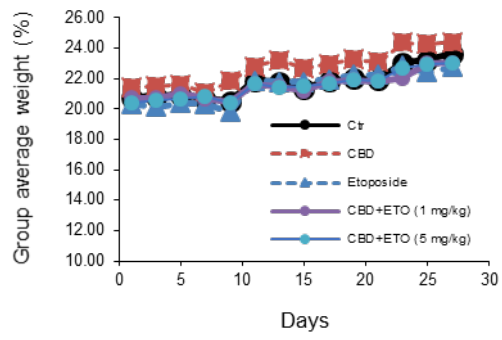

**Supplementary Fig. 3 Body weight change during *in vivo* experiment.** A plot shows the body weight change during *in vivo* experiment.

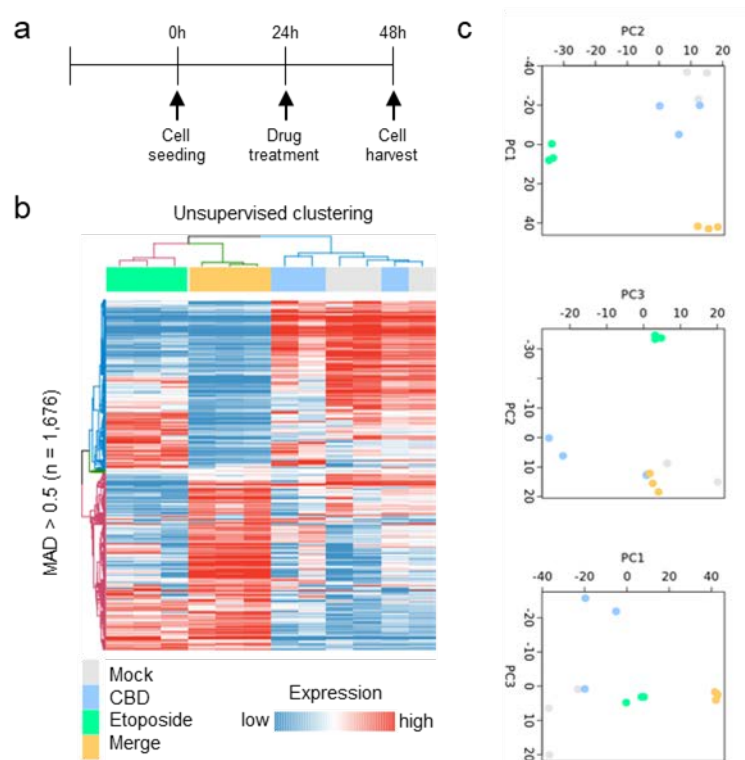

**Supplementary Fig. 4 Unsupervised clustering heatmap and PCA.** (a) The schematic illustrates the workflow and details of sample preparation process of A549 cells for RNA-seq. A549 cells treated with CBD (15  $\mu$ M), etoposide (20  $\mu$ M), and their combination (merge) at 24 h. (b) A heatmap shows the unsupervised clustering of transcriptome data, demonstrating that the transcriptome of variably expressed genes (median absolute deviation > 0.5, n = 1,676) shows distinct patterns based on treatment status. (c) Principal component analysis using these variable genes reveals that groups are notably distributed in distinct clusters.

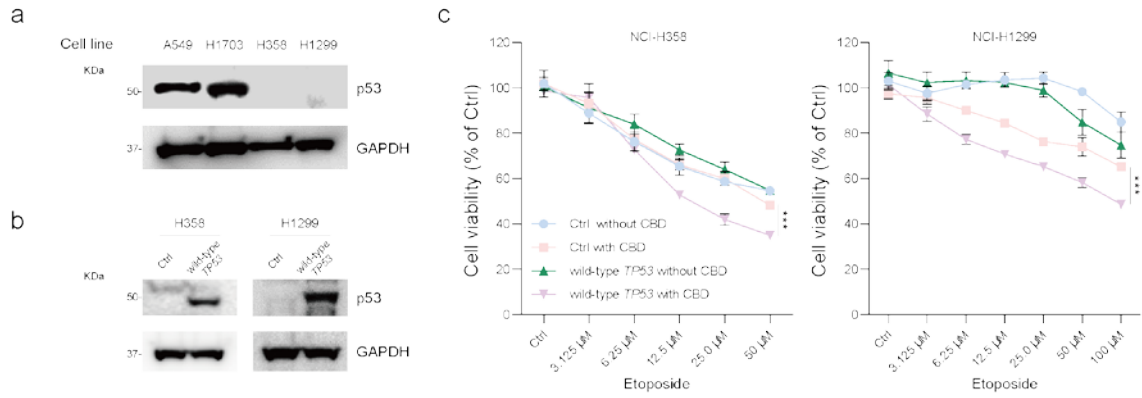

**Supplementary Fig. 5 Establishment of p53-overexpressing cell lines and assessment of combination treatment efficacy using WST-8 assay.** (a) Western blot analysis of p53 and GAPDH in NSCLC cell lines (A549, NCI-H1703, NCI-H358, and NCI-H1299). (b) Western blot analysis of p53 and GAPDH in control cells (Ctrl) and established wild-type *TP53*-overexpressing cells. (c) Plots show the cell viability of Ctrl and wild-type *TP53*-overexpressing cells treated with etoposide, with or without CBD, for 48 h in NCI-H358 and NCI-H1299, respectively. Statistical significance is indicated (\*\*\*)  $P < 0.001$ ; Student's t-test).
