# Supplementary material for: Cannabidiol potentiates p53-driven autophagic cell death in non-small cell lung cancer following DNA damage: a novel synergistic approach beyond canonical pathways
Source: Springer Nature journal article supplement (doi:10.1038/s12276-025-01444-x), 2025-05-01
Supplement: MOESM2 [file 12276_2025_1444_MOESM2_ESM.pdf]

Supplementary Table 1. Antibodies used from western blotting and immunofluorescence

| Antibodies                                     | Company        | Identifier                       | Dilution for WB | Dilution for IF |
|------------------------------------------------|----------------|----------------------------------|-----------------|-----------------|
| Rabbit monoclonal anti-PARP                    | Cell Signaling | Cat# 9532; RRID: AB_659884       | 1:1,000         |                 |
| Rabbit monoclonal anti-Bax                     | Cell Signaling | Cat# 41162; RRID: AB_2924730     | 1:1,000         |                 |
| Rabbit monoclonal anti-Bcl2                    | Cell Signaling | Cat# 15071; RRID: AB_2744528     | 1:1,000         |                 |
| Rabbit monoclonal anti-LC3B                    | Cell Signaling | Cat# 3868; RRID: AB_2137707      | 1:1,000         | 1:50 - 1:200    |
| Rabbit polyclonal anti-Beclin-1                | Cell Signaling | Cat# 3738; RRID: AB_490837       | 1:1,000         |                 |
| Rabbit monoclonal anti-SQSTM1/p62              | Cell Signaling | Cat# 39749; RRID: AB_2799160     | 1:1,000         | 1:50 - 1:200    |
| Rabbit polyclonal anti-BID                     | Cell Signaling | Cat# 2002; RRID: AB_10692485     | 1:1,000         |                 |
| Rabbit polyclonal anti-Cleaved Caspase-9       | Cell Signaling | Cat# 9509; RRID: AB_2073476      | 1:1,000         |                 |
| Rabbit polyclonal anti-Cleaved Caspase-8       | Cell Signaling | Cat# 8592; RRID: AB_10891784     | 1:1,000         |                 |
| Rabbit monoclonal anti-Phospho-PI3K (Tyr458)   | Cell Signaling | Cat# 17366; RRID: AB_2895293     | 1:1,000         |                 |
| Rabbit monoclonal anti-PI3K                    | Cell Signaling | Cat# 4257; RRID: AB_659889       | 1:1,000         |                 |
| Rabbit polyclonal anti-Phospho-AKT (Ser473)    | Cell Signaling | Cat# 9271; RRID: AB_329825       | 1:1,000         |                 |
| Rabbit monoclonal anti-AKT                     | Cell Signaling | Cat# 4685; RRID: AB_2225340      | 1:1,000         |                 |
| Rabbit polyclonal anti-Phospho-mTOR (Ser2481)  | Cell Signaling | Cat# 2974; RRID: AB_2262884      | 1:1,000         |                 |
| Rabbit monoclonal anti-mTOR                    | Cell Signaling | Cat# 2983; RRID: AB_2105622      | 1:1,000         |                 |
| Rabbit polyclonal anti-Phospho-p53 (Ser46)     | Cell Signaling | Cat# 2521; RRID: AB_10828689     | 1:1,000         |                 |
| Rabbit monoclonal anti-p53                     | Cell Signaling | Cat# 2527; RRID: AB_10695803     | 1:1,000         |                 |
| Rabbit polyclonal anti-Phospho-MDM2 (Ser395)   | Thermo Fisher  | Cat# PA5-13008; RRID: AB_2235259 | 1:1,000         |                 |
| Rabbit monoclonal anti-MDM2                    | Cell Signaling | Cat# 86934; RRID: AB_2784534     | 1:1,000         |                 |
| Rabbit monoclonal anti-Phospho-MST1 (Thr180)   | Cell Signaling | Cat# 49332; RRID: AB_2799355     | 1:1,000         |                 |
| Rabbit polyclonal anti-MST1                    | Cell Signaling | Cat# 3682; RRID: AB_2144632      | 1:1,000         |                 |
| Rabbit monoclonal anti-Phospho-LATS1 (Thr1079) | Cell Signaling | Cat# 8654; RRID: AB_10971635     | 1:1,000         |                 |
| Rabbit monoclonal anti-LATS1                   | Cell Signaling | Cat# 3477; RRID: AB_2133513      | 1:1,000         |                 |
| Rabbit monoclonal anti-Phospho-YAP (Ser109)    | Cell Signaling | Cat# 53749; RRID: AB_2799445     | 1:1,000         |                 |
| Rabbit polyclonal anti-Phospho-YAP (Ser127)    | Cell Signaling | Cat# 4911; RRID: AB_2218913      | 1:1,000         |                 |
| Rabbit monoclonal anti-YAP                     | Cell Signaling | Cat# 14074; RRID: AB_2650491     | 1:1,000         |                 |
| Rabbit monoclonal anti-GAPDH                   | Cell Signaling | Cat# 2118; RRID: AB_10698756     | 1:1,000         |                 |
| anti-mouse IgG, HRP-linked Antibody            | Cell Signaling | Cat# 7074; RRID: AB_2099233      | 1:2,000         |                 |

WB, western blotting; IF, immunofluorescence

Supplementary Table 2. Information on tools and references used

| Tool/reference                     | description                                                      | version    | Cite                                                                                                                      |
|------------------------------------|------------------------------------------------------------------|------------|---------------------------------------------------------------------------------------------------------------------------|
| Tophat2                            | Alignment of transcriptomes using RNA-seq reads                  | V2. 1. 1   | <a href="https://ccb.jhu.edu/software/tophat">https://ccb.jhu.edu/software/tophat</a>                                     |
| Cufflinks                          | Assembly of aligned RNA-Seq reads                                | V2. 2. 1   | <a href="https://cole-trapnell-lab.github.io/cufflinks/manual/">https://cole-trapnell-lab.github.io/cufflinks/manual/</a> |
| R                                  | Software environment for statistical computing and visualization | V4. 2. 2   | <a href="https://www.r-project.org/">https://www.r-project.org/</a>                                                       |
| GRCh38.primary_assembly.genome.fa  | FASTA file for sequence alignment                                | Release 47 | <a href="https://www.gencodegenes.org/human/">https://www.gencodegenes.org/human/</a>                                     |
| Gencode.v45.basic.annotation.2.gtf | GFT file for annotation                                          | Release 45 | <a href="https://www.gencodegenes.org/human/release_45.html">https://www.gencodegenes.org/human/release_45.html</a>       |

Supplementary Table 3. Primers used for qRT-PCR and cloning

| Gene name              | Purpose      | Species | Sequence (5'→3')                      | Annealing |
|------------------------|--------------|---------|---------------------------------------|-----------|
| <i>CNR1</i> infusion F | Cloning      | Human   | CATAGAAGATTCTAGATGAAGTCGATCCTAGATGGCC | 65°C      |
| <i>CNR1</i> infusion R | Cloning      | Human   | AGATCCTTCGCGGCCTCACAGAGCCTCGGCAGAC    |           |
| <i>CNR2</i> infusion F | Cloning      | Human   | CATAGAAGATTCTAGATGGAGGAATGCTGGGTGAC   | 65°C      |
| <i>CNR2</i> infusion R | Cloning      | Human   | AGATCCTTCGCGGCCTCAGCAATCAGAGAGGTCTAG  |           |
| <i>TP53</i> infusion F | Cloning      | Human   | CATAGAAGATTCTAGATGGAGGAGCCGAGTCAG     | 68°C      |
| <i>TP53</i> infusion R | Cloning      | Human   | AGATCCTTCGCGGCCTCAGTCTGAGTCAGGCC      |           |
| <i>TRPV1</i> F         | qRT-PCR/ PCR | Human   | CAAACCGATTTGACCGAGAT                  | 65°C      |
| <i>TRPV1</i> R         | qRT-PCR/ PCR | Human   | GTCAGCACAGCCTTCATCA                   |           |
| <i>TRPV2</i> F         | qRT-PCR/ PCR | Human   | CAAACCGATTTGACCGAGAT                  | 65°C      |
| <i>TRPV2</i> R         | qRT-PCR/ PCR | Human   | GTCAGCACAGCCTTCATCA                   |           |
| <i>GAPDH</i> F         | qRT-PCR/ PCR | Human   | CAGCCTCAAGATCATCAGCA                  | 58°C      |
| <i>GAPDH</i> R         | qRT-PCR/ PCR | Human   | TGTGGTCATGAGTCCTCCA                   |           |

F, forward; R, reverse.

Supplementary Table 4. IC<sub>50</sub> value of combination treatment with cannabis-related compounds and etoposide

| Drug | IC <sub>50</sub> (μM), 48 h |
|------|-----------------------------|
|      | with Etoposide              |
| CBDA | > 100                       |
| CBD  | 15.77±1.35                  |
| THC  | > 100                       |
| THCA | > 100                       |

Supplementary Table 5. List of differentially expressed genes (DEGs)

| No | Up genes (n = 1,157) | Down genes (n = 1,125) |
|----|----------------------|------------------------|
| 1  | LCN2                 | HES4                   |
| 2  | IFI6                 | MXRA8                  |
| 3  | ISG15                | MRPL20                 |
| 4  | LCE1F                | NPHP4                  |
| 5  | MT1X                 | ERRFI1                 |
| 6  | IFIT3                | CENPS-CORT             |
| 7  | MX1                  | CENPS                  |
| 8  | MT2A                 | EFHD2                  |
| 9  | OASL                 | AGMAT                  |
| 10 | GALNT12              | PADI1                  |
| 11 | CCL5                 | KLHDC7A                |
| 12 | IFIT1                | RCC2                   |
| 13 | CD68                 | IFFO2                  |
| 14 | METRNL               | MRTO4                  |
| 15 | IL6                  | CAPZB                  |
| 16 | BCL2A1               | MICOS10                |
| 17 | PI3                  | RAP1GAP                |
| 18 | SAA2                 | ECE1                   |
| 19 | IFIT2                | E2F2                   |
| 20 | LAMC2                | ID3                    |
| 21 | STC1                 | SELENON                |
| 22 | CSF2                 | AUNIP                  |
| 23 | ANXA10               | HMGN2                  |
| 24 | TMEM171              | TENT5B                 |
| 25 | IL24                 | TRNAU1AP               |
| 26 | IGFN1                | ZMYM6                  |
| 27 | ITGB3                | CLSPN                  |
| 28 | PLAUR                | CDCA8                  |
| 29 | SPOCD1               | HEYL                   |
| 30 | CDCP1                | CITED4                 |
| 31 | TNFAIP3              | EDN2                   |
| 32 | TMEM158              | SLFN1                  |
| 33 | SFN                  | CDC20                  |
| 34 | HERC5                | STIL                   |
| 35 | IL1A                 | CDKN2C                 |
| 36 | CTSS                 | ORC1                   |
| 37 | RRAD                 | PRPF38A                |
| 38 | HK2                  | COA7                   |
| 39 | ZFP36                | PRKAA2                 |
| 40 | HELZ2                | NFIA                   |
| 41 | CLMP                 | ROR1                   |
| 42 | SLC52A1              | DEPDC1                 |

|    |          |          |
|----|----------|----------|
| 43 | HSPA1A   | LRRC40   |
| 44 | HSPA1B   | GNG12    |
| 45 | THBD     | LHX8     |
| 46 | PARP9    | CRYZ     |
| 47 | PRPH     | ZZZ3     |
| 48 | GREM1    | ZNHIT6   |
| 49 | NSG1     | HS2ST1   |
| 50 | PNRC1    | LRRC8B   |
| 51 | GFPT2    | CDC7     |
| 52 | HES2     | SLC44A3  |
| 53 | CSTA     | ALG14    |
| 54 | THEMIS2  | TLCD4    |
| 55 | TIPARP   | DBT      |
| 56 | SLC25A37 | COL11A1  |
| 57 | NKX3-1   | VAV3     |
| 58 | GCOM1    | SLC25A24 |
| 59 | BEX4     | CELSR2   |
| 60 | OAS2     | PSRC1    |
| 61 | ARVCF    | SORT1    |
| 62 | NECTIN4  | GSTM4    |
| 63 | ZNF385A  | EPS8L3   |
| 64 | SP100    | AHCYL1   |
| 65 | FLYWCH1  | WDR77    |
| 66 | MARCHF3  | NRAS     |
| 67 | STAT2    | PTGFRN   |
| 68 | CHST1    | MAN1A2   |
| 69 | CRTAC1   | WDR3     |
| 70 | BEX2     | FAM72B   |
| 71 | YPEL3    | FAM72C   |
| 72 | THSD1    | FAM72D   |
| 73 | IRAK2    | PEX11B   |
| 74 | UNC5B    | H2AC20   |
| 75 | ZC3H12A  | ANP32E   |
| 76 | CDKN1A   | TUFT1    |
| 77 | TM4SF19  | S100A10  |
| 78 | SCG5     | S100A4   |
| 79 | DNAJB5   | S100A3   |
| 80 | PML      | CKS1B    |
| 81 | ITPR3    | TAGLN2   |
| 82 | NGFR     | UCK2     |
| 83 | BST2     | MPC2     |
| 84 | ARG2     | CENPL    |
| 85 | COL6A2   | RASAL2   |
| 86 | MUSTN1   | KIF14    |

|     |           |          |
|-----|-----------|----------|
| 87  | IFIH1     | CFH      |
| 88  | KDELR3    | CSRP1    |
| 89  | UBE2L6    | UBE2T    |
| 90  | GPX1      | SNRPE    |
| 91  | ABLIM3    | NUAK2    |
| 92  | HMGA2     | NUCKS1   |
| 93  | PLXNB3    | KCNH1    |
| 94  | PARP12    | NEK2     |
| 95  | BMF       | KCTD3    |
| 96  | N4BP3     | RRP15    |
| 97  | WBP2      | TGFB2    |
| 98  | TIMP4     | IARS2    |
| 99  | REC8      | MTARC1   |
| 100 | TMOD1     | ENAH     |
| 101 | STRIP2    | SRP9     |
| 102 | SLAMF7    | H3-3A    |
| 103 | GALNT9    | ABCB10   |
| 104 | LYNX1     | URB2     |
| 105 | RNF19B    | FAM89A   |
| 106 | HSPA6     | CHML     |
| 107 | CALCOCO1  | TBCE     |
| 108 | NROB1     | COX20    |
| 109 | AREG      | TFB2M    |
| 110 | TIMP1     | GTPBP4   |
| 111 | PLEKHM1   | IDI2     |
| 112 | GDF15     | ZMYND11  |
| 113 | PPP1R18   | ANKRD16  |
| 114 | MT1A      | ITIH2    |
| 115 | SH2D2A    | PFKFB3   |
| 116 | C1QTNF1   | MCM10    |
| 117 | GCH1      | HACD1    |
| 118 | ARC       | BMI1     |
| 119 | DRAXIN    | MSRB2    |
| 120 | TNFRSF10D | PDSS1    |
| 121 | LPIN3     | MASTL    |
| 122 | MILR1     | ANKRD30A |
| 123 | SH3KBP1   | PARD3    |
| 124 | SP140L    | GPRIN2   |
| 125 | PARP14    | NPY4R    |
| 126 | XDH       | ZNF488   |
| 127 | HMGA1     | SYT15B   |
| 128 | FCHSD1    | NPY4R2   |
| 129 | CLGN      | A1CF     |
| 130 | DHRS7     | ZWINT    |

|     |            |         |
|-----|------------|---------|
| 131 | ATG16L2    | IPMK    |
| 132 | GK         | CISD1   |
| 133 | PLA2G4C    | BICC1   |
| 134 | ULBP2      | RHOBTB1 |
| 135 | LZTS3      | RTKN2   |
| 136 | NAMPT      | ARID5B  |
| 137 | LY96       | PBLD    |
| 138 | HSD17B14   | HKDC1   |
| 139 | DHRS9      | TSPAN15 |
| 140 | DTX3L      | DDX21   |
| 141 | FBXO32     | VSIR    |
| 142 | TNFSF9     | NUDT13  |
| 143 | GRIP2      | PAPSS2  |
| 144 | SERTAD1    | KIF20B  |
| 145 | ARHGEF4    | ANKRD1  |
| 146 | BTN3A1     | PPP1R3C |
| 147 | ZC3HAV1    | CYP26A1 |
| 148 | GOS2       | KIF11   |
| 149 | TP53INP1   | CEP55   |
| 150 | SAMD9      | PLCE1   |
| 151 | LAT        | ANKRD2  |
| 152 | RIN1       | PGAM1   |
| 153 | POLR2J2    | AVPI1   |
| 154 | PLK3       | CNNM1   |
| 155 | BMAL2      | CPN1    |
| 156 | SMIM29     | ERLIN1  |
| 157 | ST6GALNAC4 | NOLC1   |
| 158 | NIPAL4     | TRUB1   |
| 159 | TRIM21     | PRDX3   |
| 160 | CTSL       | TACC2   |
| 161 | ZNFX1      | MKI67   |
| 162 | S100P      | ECHS1   |
| 163 | ASTN2      | MTG1    |
| 164 | FDXR       | ZNF511  |
| 165 | DUSP5      | TSPAN4  |
| 166 | SPRR2D     | CARS1   |
| 167 | CNNM4      | TRIM6   |
| 168 | EVI2B      | FAR1    |
| 169 | PTGS2      | TEAD1   |
| 170 | SLFN5      | E2F8    |
| 171 | LACC1      | KIF18A  |
| 172 | ENGASE     | LGR4    |
| 173 | DMKN       | IMMP1L  |
| 174 | P2RX4      | BDNF    |

|     |           |          |
|-----|-----------|----------|
| 175 | BDKRB1    | ELP4     |
| 176 | ICOSLG    | CAT      |
| 177 | GNRH1     | FJX1     |
| 178 | TYMP      | ALX4     |
| 179 | APOL6     | ARFGAP2  |
| 180 | SERINC2   | ACP2     |
| 181 | PLPP5     | CKAP5    |
| 182 | FADS3     | P2RX3    |
| 183 | L1CAM     | TIMM10   |
| 184 | TPST2     | RTN4RL2  |
| 185 | MERTK     | FAM111B  |
| 186 | SAT1      | FEN1     |
| 187 | NPTXR     | INCENP   |
| 188 | IER3      | ASRGL1   |
| 189 | GOLGA8A   | GANAB    |
| 190 | WHRN      | RCOR2    |
| 191 | RAB38     | COX8A    |
| 192 | TMEM52    | FLRT1    |
| 193 | IDUA      | BANF1    |
| 194 | YPEL4     | PACS1    |
| 195 | DYSF      | RBM14    |
| 196 | TNFRSF25  | RBM4     |
| 197 | ZMAT3     | PC       |
| 198 | PGF       | TPCN2    |
| 199 | ADAMTS7   | SHANK2   |
| 200 | SLC17A5   | XNDC1N   |
| 201 | SAMD9L    | ARHGEF17 |
| 202 | PLXNA3    | DNAJB13  |
| 203 | MICALL1   | UCP2     |
| 204 | RNF24     | LIPT2    |
| 205 | CFAP36    | LRRC51   |
| 206 | LRP1      | ANAPC15  |
| 207 | H2BC5     | ARRB1    |
| 208 | GPCPD1    | SYTL2    |
| 209 | HCAR2     | ARHGAP42 |
| 210 | IFI44L    | PDGFD    |
| 211 | NTN1      | SLN      |
| 212 | ASS1      | ALKBH8   |
| 213 | CACNG8    | PIH1D2   |
| 214 | TNFAIP8L3 | TIMM8B   |
| 215 | TPBG      | H2AX     |
| 216 | LRRC75A   | SORL1    |
| 217 | TMEM92    | GRAMD1B  |
| 218 | ABHD17C   | NRGN     |

|     |                |         |
|-----|----------------|---------|
| 219 | EEIG1          | SPA17   |
| 220 | TSPYL2         | CHEK1   |
| 221 | EML2           | HYLS1   |
| 222 | CREBRF         | NCAPD3  |
| 223 | MROH1          | FOXN1   |
| 224 | TRIB1          | TEAD4   |
| 225 | CORO2B         | TPI1    |
| 226 | VDR            | MAGOHB  |
| 227 | H2AC18         | LRP6    |
| 228 | H2AC19         | PDE3A   |
| 229 | FBXO44         | SLCO1B1 |
| 230 | TMCC3          | ETNK1   |
| 231 | RGMA           | ETFRF1  |
| 232 | LYNX1-SLURP2   | KRAS    |
| 233 | SH3BGRL3       | FGD4    |
| 234 | TPRG1L         | PKP2    |
| 235 | GAMT           | YAF2    |
| 236 | MYO5A          | PUS7L   |
| 237 | TMEM59L        | CNTN1   |
| 238 | BORCS5         | SLC38A2 |
| 239 | BLOC1S5-TXNDC5 | PCED1B  |
| 240 | MAGED4         | TROAP   |
| 241 | PRKD2          | KRT80   |
| 242 | DNAJA1         | KRT4    |
| 243 | TMEM132A       | KRT81   |
| 244 | BTN3A2         | ESPL1   |
| 245 | NPIP1B1        | TNS2    |
| 246 | IFI35          | HOXC8   |
| 247 | MAPRE3         | TMT1B   |
| 248 | TPP1           | BLOC1S1 |
| 249 | BICDL1         | RDH5    |
| 250 | ATG2A          | KRT18   |
| 251 | RRM2B          | PA2G4   |
| 252 | MDM2           | RBMS2   |
| 253 | MT1G           | ATP5F1B |
| 254 | MAGED4B        | GLI1    |
| 255 | SPEG           | YEATS4  |
| 256 | SP110          | LIN7A   |
| 257 | ATP6V1F        | ALX1    |
| 258 | ACER2          | RASSF9  |
| 259 | ARSG           | NTS     |
| 260 | RRBP1          | GALNT4  |
| 261 | MICAL1         | SNRPF   |
| 262 | EFNB1          | GAS2L3  |

|     |         |         |
|-----|---------|---------|
| 263 | HPS3    | UTP20   |
| 264 | DUSP6   | PARPBP  |
| 265 | CASP10  | PMCH    |
| 266 | HERC6   | SLC25A3 |
| 267 | LCE1E   | NFYB    |
| 268 | HRH1    | NUAK1   |
| 269 | ELL2    | CRY1    |
| 270 | USF1    | ABTB3   |
| 271 | SQOR    | IFT81   |
| 272 | SPATA18 | SDSL    |
| 273 | BEST1   | PEBP1   |
| 274 | MAGEH1  | CIT     |
| 275 | ALOX5   | HNF1A   |
| 276 | BRICD5  | KMT5A   |
| 277 | PLEKHO2 | GTF2H3  |
| 278 | GIPR    | NCOR2   |
| 279 | CSNK1E  | PUS1    |
| 280 | INSYN2B | PXMP2   |
| 281 | AK1     | ZNF605  |
| 282 | KDM7A   | LATS2   |
| 283 | SLC26A6 | SKA3    |
| 284 | FNDC4   | MIPEP   |
| 285 | NBPF15  | MTMR6   |
| 286 | PSMB8   | SLC7A1  |
| 287 | ADAR    | BRCA2   |
| 288 | NBPF9   | HMGB1   |
| 289 | IL33    | STARD13 |
| 290 | CGB7    | RFC3    |
| 291 | ADRB2   | POSTN   |
| 292 | LAPTMS  | VWA8    |
| 293 | AADAC   | GPALPP1 |
| 294 | FRMD8   | NUDT15  |
| 295 | PLA2G4B | EBPL    |
| 296 | ANKRD29 | SPRYD7  |
| 297 | MIA3    | DIAPH3  |
| 298 | H2BC12  | PCDH9   |
| 299 | SHC2    | MZT1    |
| 300 | TTC39B  | BORA    |
| 301 | ASAH1   | KLF5    |
| 302 | TDRD7   | NDFIP2  |
| 303 | USP18   | LMO7    |
| 304 | VWCE    | GPC6    |
| 305 | CCN3    | MBNL2   |
| 306 | F3      | NALCN   |

|     |          |           |
|-----|----------|-----------|
| 307 | RTL5     | ITGBL1    |
| 308 | RRAGD    | IRS2      |
| 309 | SAXO4    | COL4A1    |
| 310 | SRGN     | F7        |
| 311 | NPAS2    | ATP11A    |
| 312 | ACTA2    | F10       |
| 313 | RINL     | PCID2     |
| 314 | DNER     | AJUBA     |
| 315 | H2BC21   | DHRS4     |
| 316 | RAB5B    | DHRS4L2   |
| 317 | CLP1     | STXBP6    |
| 318 | EFR3B    | G2E3      |
| 319 | RPS27    | SPTSSA    |
| 320 | POMGNT1  | FANCM     |
| 321 | CYGB     | LRR1      |
| 322 | RALGDS   | POLE2     |
| 323 | RAB4B    | TRIM9     |
| 324 | CCNO     | WDHD1     |
| 325 | CES2     | SPTB      |
| 326 | TAP1     | MTHFD1    |
| 327 | ATP2B4   | ACOT1     |
| 328 | RAP2B    | JDP2      |
| 329 | SERPINB8 | POMT2     |
| 330 | TRIM3    | SPTLC2    |
| 331 | BHLHE40  | NRXN3     |
| 332 | PIM2     | FLRT2     |
| 333 | SHISAL1  | EFCAB11   |
| 334 | SPRED3   | SERPINA3  |
| 335 | MGST2    | CCDC85C   |
| 336 | TRIM8    | EXOC3L4   |
| 337 | OPTN     | TRMT61A   |
| 338 | GSAP     | XRCC3     |
| 339 | RGS16    | CDCA4     |
| 340 | NRBP2    | CRIP1     |
| 341 | SYT7     | TEDC1     |
| 342 | LIMK1    | UBE3A     |
| 343 | INO80B   | GABRB3    |
| 344 | HOXC4    | GABRA5    |
| 345 | SDC4     | TJP1      |
| 346 | TPRA1    | ARHGAP11A |
| 347 | BVES     | ZNF770    |
| 348 | GPX3     | SPRED1    |
| 349 | FAM25A   | THBS1     |
| 350 | DCUN1D3  | KNL1      |

|     |            |          |
|-----|------------|----------|
| 351 | MFSD2A     | INO80    |
| 352 | EMILIN3    | CKMT1A   |
| 353 | CPPED1     | WDR76    |
| 354 | GPR87      | NUSAP1   |
| 355 | COL16A1    | OIP5     |
| 356 | BCL10      | SORD     |
| 357 | TNFAIP8    | DUT      |
| 358 | BBLN       | SLC27A2  |
| 359 | RBPM52     | MYO5C    |
| 360 | STN1       | PIF1     |
| 361 | SIN3B      | DIS3L    |
| 362 | TMEM91     | SMAD6    |
| 363 | ARSA       | ITGA11   |
| 364 | MTURN      | KIF23    |
| 365 | GDI1       | ZWILCH   |
| 366 | KCNK6      | THSD4    |
| 367 | TRANK1     | NPTN     |
| 368 | ZNF697     | CHRNA5   |
| 369 | TIFA       | PDE8A    |
| 370 | NAPB       | NTRK3    |
| 371 | TAB3       | FANCI    |
| 372 | ZNF774     | BLM      |
| 373 | RELA       | RCCD1    |
| 374 | LY6K       | PRC1     |
| 375 | STK10      | NR2F2    |
| 376 | CALB2      | IGF1R    |
| 377 | ARL4D      | POLR3K   |
| 378 | KLHDC7B    | SNRNP25  |
| 379 | NOP53      | METRNL   |
| 380 | NATD1      | MEIOB    |
| 381 | HLA-E      | TEDC2    |
| 382 | DAXX       | VASN     |
| 383 | QSOX1      | EEF2KMT  |
| 384 | GABBR1     | ZC3H7A   |
| 385 | C1QL4      | COQ7     |
| 386 | MTSS1      | ERI2     |
| 387 | MYPOP      | EARS2    |
| 388 | STMN4      | SLC5A11  |
| 389 | VPS11      | QPRT     |
| 390 | ISY1-RAB43 | KIF22    |
| 391 | CCDC167    | DCTPP1   |
| 392 | AIFM2      | SHCBP1   |
| 393 | SESN1      | RPGRIP1L |
| 394 | ENTPD4     | CDH16    |

|     |              |          |
|-----|--------------|----------|
| 395 | GJB2         | CDH1     |
| 396 | INSYN2A      | CHTF8    |
| 397 | ALOXE3       | PDF      |
| 398 | PGGHG        | CYB5B    |
| 399 | CCL3L3       | NQO1     |
| 400 | XAGE1A       | MTSS2    |
| 401 | ZNF581       | DHODH    |
| 402 | MSC          | AARS1    |
| 403 | MDK          | BCO1     |
| 404 | TVP23C-CDRT4 | CMIP     |
| 405 | SLC17A7      | CMC2     |
| 406 | CHST2        | GCSH     |
| 407 | MARCO        | CENPN    |
| 408 | CTSH         | COTL1    |
| 409 | AOC2         | CDT1     |
| 410 | FOSB         | DPEP1    |
| 411 | FOS          | SLC7A5   |
| 412 | MINK1        | RFLNB    |
| 413 | PTPRU        | NXN      |
| 414 | MCRIP1       | SERPINF2 |
| 415 | ZNF574       | ITGAE    |
| 416 | IFNAR2       | HASPIN   |
| 417 | TNIK         | UBE2G1   |
| 418 | RASSF5       | ZNF594   |
| 419 | PTAFR        | DHX33    |
| 420 | GPRIN1       | PIMREG   |
| 421 | CYTH1        | ASGR1    |
| 422 | SMG8         | NUP88    |
| 423 | XAGE1B       | EIF5A    |
| 424 | ARL1         | TP53     |
| 425 | PHLDA2       | CYB5D1   |
| 426 | PPIF         | GLP2R    |
| 427 | DMRTA1       | TRIM16   |
| 428 | CUL7         | PMP22    |
| 429 | TTLL4        | SHMT1    |
| 430 | PPM1K        | TMEM97   |
| 431 | SH2B3        | ATAD5    |
| 432 | COL7A1       | CCL2     |
| 433 | RILPL1       | RDM1     |
| 434 | INPP1        | PIGW     |
| 435 | HCAR3        | ACACA    |
| 436 | GOLGA3       | ARHGAP23 |
| 437 | TMEM151A     | CISD3    |
| 438 | MOB3C        | CDC6     |

|     |               |          |
|-----|---------------|----------|
| 439 | EFNA4         | RARA     |
| 440 | FXVD5         | TOP2A    |
| 441 | TRAF1         | IGFBP4   |
| 442 | BCL2L2-PABPN1 | CAVIN1   |
| 443 | RSAD2         | NAGLU    |
| 444 | MAGED2        | PSMC3IP  |
| 445 | LIN7B         | PLEKHH3  |
| 446 | VIM           | CNTNAP1  |
| 447 | ANKMY2        | FZD2     |
| 448 | EFL1          | DBF4B    |
| 449 | CYTH2         | UBTF     |
| 450 | LIF           | KIF18B   |
| 451 | SNX21         | BRCA1    |
| 452 | NBPF8         | HEXIM1   |
| 453 | WNT9A         | MAP3K14  |
| 454 | SLC22A15      | PRR15L   |
| 455 | PPY           | GIP      |
| 456 | DIRAS1        | SPOP     |
| 457 | SELENOM       | EME1     |
| 458 | HECA          | HLF      |
| 459 | UBXN7         | CUEDC1   |
| 460 | RRAGA         | NME1     |
| 461 | DEFB1         | MKS1     |
| 462 | H1-2          | BRIP1    |
| 463 | PLEKHF1       | PRKCA    |
| 464 | FAM43A        | RAB37    |
| 465 | CDKN1C        | SMIM6    |
| 466 | RPL36         | CASKIN2  |
| 467 | CYP1A1        | MGAT5B   |
| 468 | PSMB6         | TK1      |
| 469 | SSR3          | BIRC5    |
| 470 | GOLGA2        | EIF4A3   |
| 471 | LAMB3         | MRPL12   |
| 472 | USO1          | SLC25A10 |
| 473 | ITGA5         | ARL16    |
| 474 | GPR108        | ALYREF   |
| 475 | JUND          | TYMS     |
| 476 | MEGF6         | ENOSF1   |
| 477 | ARID3B        | NDC80    |
| 478 | NEURL3        | MTCL1    |
| 479 | CLMN          | AFG3L2   |
| 480 | USP35         | CABLES1  |
| 481 | ZBTB7A        | DSC2     |
| 482 | GMIP          | TTR      |

|     |            |          |
|-----|------------|----------|
| 483 | KLHL21     | RNF138   |
| 484 | FAM89B     | ACTG1    |
| 485 | STXBP1     | MAPRE2   |
| 486 | CNP        | SMAD7    |
| 487 | WASHC2A    | CTIF     |
| 488 | CRABP2     | SMAD2    |
| 489 | ROBO3      | SKA1     |
| 490 | CEP170B    | ALPK2    |
| 491 | ZNF337     | NEDD4L   |
| 492 | SCX        | PHLPP1   |
| 493 | CCDC30     | BCL2     |
| 494 | APOL2      | TMX3     |
| 495 | TREX1      | SOCS6    |
| 496 | FAM219A    | CYB5A    |
| 497 | PANX1      | ZNF236   |
| 498 | MARF1      | MISP     |
| 499 | DCP1B      | PTBP1    |
| 500 | PAX8       | POLR2E   |
| 501 | NPIP12     | ATP5F1D  |
| 502 | CSGALNACT2 | MBD3     |
| 503 | RDH10      | TIMM13   |
| 504 | BPGM       | TLE2     |
| 505 | WTAP       | TEKTIP1  |
| 506 | UQCR11     | SEMA6B   |
| 507 | HAS3       | UHRF1    |
| 508 | EHD3       | CRB3     |
| 509 | ATOSB      | VAV1     |
| 510 | SUSD6      | PEX11G   |
| 511 | IFFO1      | ARHGEF18 |
| 512 | SH3PXD2A   | CD320    |
| 513 | PPP1R14C   | HNRNPM   |
| 514 | ARFGAP1    | OLFM2    |
| 515 | SIX1       | PPAN     |
| 516 | HK1        | AP1M2    |
| 517 | NOVA1      | RNASEH2A |
| 518 | SCHIP1     | ADGRL1   |
| 519 | MYL5       | DDX39A   |
| 520 | ERFL       | GIPC1    |
| 521 | CCNL1      | CYP4F3   |
| 522 | UBXN1      | HAUS8    |
| 523 | NRBF2      | ARRDC2   |
| 524 | TICAM1     | ISYNA1   |
| 525 | SFRP1      | UQCRRF51 |
| 526 | IGBP1      | ZNF507   |

|     |          |         |
|-----|----------|---------|
| 527 | ZMIZ2    | NUDT19  |
| 528 | OGFR     | RHPN2   |
| 529 | TRIML2   | ZNF599  |
| 530 | TNFAIP1  | PRODH2  |
| 531 | CARD6    | IGFLR1  |
| 532 | RTL8C    | ZNF260  |
| 533 | LPAR2    | ZNF146  |
| 534 | HYPK     | SARS2   |
| 535 | STX12    | ACTN4   |
| 536 | RPL12    | FCGBP   |
| 537 | EIF1AD   | TMEM145 |
| 538 | ZFYVE19  | LIPE    |
| 539 | ZNF841   | BCAM    |
| 540 | HLA-A    | ZC3H4   |
| 541 | DYNC1I2  | SLC1A5  |
| 542 | SLC31A1  | SYNGR4  |
| 543 | CDK5R2   | SULT2B1 |
| 544 | RNF168   | CA11    |
| 545 | MAP2     | DBP     |
| 546 | MLLT11   | RUVBL2  |
| 547 | PCDHGC3  | ETFB    |
| 548 | PATL1    | CLDND2  |
| 549 | ENTPD7   | TMEM190 |
| 550 | FIG4     | IL11    |
| 551 | NSMF     | ZNF772  |
| 552 | TOX2     | UBE2S   |
| 553 | CREG1    | ID2     |
| 554 | HDHD3    | TTC32   |
| 555 | GPKOW    | MATN3   |
| 556 | PRX      | WDR35   |
| 557 | MXI1     | GEN1    |
| 558 | TOM1     | RAB10   |
| 559 | GRINA    | CAD     |
| 560 | EIF5A2   | WDR43   |
| 561 | SLC9A7   | LBH     |
| 562 | ZSWIM8   | CRIM1   |
| 563 | TRIM11   | SRSF7   |
| 564 | TMEM225B | EML4    |
| 565 | APOBEC3C | SLC3A1  |
| 566 | ZNRF1    | LRPPRC  |
| 567 | TRIM38   | CALM2   |
| 568 | PANX2    | CHAC2   |
| 569 | GRIN3B   | SPTBN1  |
| 570 | NINJ1    | PRADC1  |

|     |                |          |
|-----|----------------|----------|
| 571 | GPR176         | TET3     |
| 572 | OAF            | POLR1A   |
| 573 | CHURC1         | MRPL35   |
| 574 | RNF39          | ST3GAL5  |
| 575 | WASHC2C        | KRCC1    |
| 576 | COG1           | NCAPH    |
| 577 | TNF            | COA5     |
| 578 | TAOK3          | ST6GAL2  |
| 579 | AGAP5          | MALL     |
| 580 | FBXL20         | BUB1     |
| 581 | ANKRD24        | POLR1B   |
| 582 | MACO1          | DDX18    |
| 583 | SPAG7          | TMEM177  |
| 584 | GUCD1          | INHBB    |
| 585 | FST            | EPB41L5  |
| 586 | TRIM34         | MAP3K2   |
| 587 | TMEM102        | GPR39    |
| 588 | DUSP10         | LYPD1    |
| 589 | IL15RA         | NCKAP5   |
| 590 | FAM167B        | MCM6     |
| 591 | INSL3          | ARL6IP6  |
| 592 | TBC1D17        | PKP4     |
| 593 | GRIN2D         | ITGB6    |
| 594 | PLEKHB2        | PSMD14   |
| 595 | GATA2          | FIGN     |
| 596 | AFAP1L1        | GRB14    |
| 597 | OVCA2          | NOSTRIN  |
| 598 | HSPH1          | PHOSPHO2 |
| 599 | ARPC1B         | CDCA7    |
| 600 | ZNF30          | ATP5MC3  |
| 601 | PLCG2          | COL3A1   |
| 602 | RPL36A-HNRNPH2 | OSGEPL1  |
| 603 | VPS9D1         | NEMP2    |
| 604 | FAM131A        | ITGAV    |
| 605 | TEP1           | CAVIN2   |
| 606 | CASP7          | HSPD1    |
| 607 | SPMIP1         | MOB4     |
| 608 | DUSP7          | AGPS     |
| 609 | TCEAL9         | NFE2L2   |
| 610 | FUT3           | FZD5     |
| 611 | SMURF2         | RPE      |
| 612 | IRGQ           | BARD1    |
| 613 | ITPKC          | CPS1     |
| 614 | ZNF133         | USP37    |

|     |         |              |
|-----|---------|--------------|
| 615 | MANF    | CTDSP1       |
| 616 | PRMT2   | ABCB6        |
| 617 | RAD52   | GLB1L        |
| 618 | TCAP    | TUBA4B       |
| 619 | ADGRE1  | FARSB        |
| 620 | NBPF19  | FN1          |
| 621 | HINFP   | SCG2         |
| 622 | IFNAR1  | IRS1         |
| 623 | NPIPA3  | USP40        |
| 624 | LCE1B   | UGT1A8       |
| 625 | CYP4F11 | UGT1A9       |
| 626 | DLGAP4  | UGT1A6       |
| 627 | PTEN    | SH3BP4       |
| 628 | NECTIN1 | SEPTIN2      |
| 629 | SAMD4B  | SNRPB        |
| 630 | UBALD2  | AP5S1        |
| 631 | LCE1C   | CDC25B       |
| 632 | ETV3    | MCM8         |
| 633 | NR2C1   | CRLS1        |
| 634 | SEC24A  | JAG1         |
| 635 | ELF3    | PLCB4        |
| 636 | TM2D1   | DSTN         |
| 637 | SBK1    | NAA20        |
| 638 | TNIP2   | GZF1         |
| 639 | ZNF853  | FOXS1        |
| 640 | STX16   | TPX2         |
| 641 | GGA3    | E2F1         |
| 642 | RBM38   | PXMP4        |
| 643 | AKAP17A | MMP24        |
| 644 | TRIP10  | DSN1         |
| 645 | NPIPA2  | TGIF2        |
| 646 | FAM171B | RBL1         |
| 647 | GPR3    | MANBAL       |
| 648 | PHF13   | LBP          |
| 649 | HSPBAP1 | FAM83D       |
| 650 | UBE2Z   | MYBL2        |
| 651 | PLEKHM2 | HNF4A        |
| 652 | TMEM63A | SRSF6        |
| 653 | FBXW7   | RIMS4        |
| 654 | MAP3K5  | UBE2C        |
| 655 | PI4KB   | EYA2         |
| 656 | OSR1    | PARD6B       |
| 657 | REEP2   | PEDS1-UBE2V1 |
| 658 | GOLGA5  | NFATC2       |

|     |           |          |
|-----|-----------|----------|
| 659 | SEPTIN3   | ADNP     |
| 660 | POM121C   | AURKA    |
| 661 | PMAIP1    | RAE1     |
| 662 | ZBTB34    | VAPB     |
| 663 | HEBP1     | CYP24A1  |
| 664 | RGCC      | NKAIN4   |
| 665 | RPL39     | ZNF512B  |
| 666 | TMEM8B    | ARFRP1   |
| 667 | TMEM44    | GABPA    |
| 668 | ZDHHC4    | URB1     |
| 669 | AGO2      | CHAF1B   |
| 670 | STAT5A    | SIM2     |
| 671 | OTUD5     | PSMG1    |
| 672 | NR1D1     | RIPK4    |
| 673 | LRRC32    | U2AF1    |
| 674 | ARPC1A    | HSF2BP   |
| 675 | BAK1      | PDXK     |
| 676 | SNX12     | COL18A1  |
| 677 | MSANTD3   | MICAL3   |
| 678 | NBPF26    | CLTCL1   |
| 679 | MEGF11    | CDC45    |
| 680 | CCDC71L   | TXNRD2   |
| 681 | RABAC1    | RSPH14   |
| 682 | RELT      | SMARCB1  |
| 683 | EID2B     | SUSD2    |
| 684 | CALU      | ZNRF3    |
| 685 | RNF25     | MTFP1    |
| 686 | TLCD5     | PES1     |
| 687 | GPAT3     | TST      |
| 688 | IFIT5     | CDC42EP1 |
| 689 | RAB6A     | H1-0     |
| 690 | CASK      | ANKRD54  |
| 691 | SNPH      | APOBEC3B |
| 692 | RASA2     | PDGFB    |
| 693 | TEAD3     | DESI1    |
| 694 | ZNF646    | MRTFA    |
| 695 | RELB      | POLR3H   |
| 696 | HDAC10    | CENPM    |
| 697 | TREM2     | XRCC6    |
| 698 | TNFRSF11A | TTLL12   |
| 699 | PRODH     | RIBC2    |
| 700 | HMGXB3    | GTSE1    |
| 701 | FAM171A2  | CELSR1   |
| 702 | CD63      | CHL1     |

|     |             |         |
|-----|-------------|---------|
| 703 | NFATC2IP    | LMCD1   |
| 704 | GID4        | CIDEC   |
| 705 | RASSF8      | NUP210  |
| 706 | CABLES2     | OXNAD1  |
| 707 | CEBPB       | KAT2B   |
| 708 | RAI14       | SGO1    |
| 709 | DPYSL4      | ANKRD28 |
| 710 | PAGE2B      | TGFBR2  |
| 711 | SMTNL1      | CNOT10  |
| 712 | PPP3CC      | CLASP2  |
| 713 | RPL23A      | CTDSPL  |
| 714 | WIPI2       | NKIRAS1 |
| 715 | CATSPERG    | NR1D2   |
| 716 | CHST15      | SEC22C  |
| 717 | CNNM2       | KIF9    |
| 718 | SEC24C      | ELP6    |
| 719 | SMIM38      | CDC25A  |
| 720 | CFAP68      | TRAIIP  |
| 721 | GAS6        | MST1R   |
| 722 | SNAI3       | DAG1    |
| 723 | CYBRD1      | IFRD2   |
| 724 | POLH        | POC1A   |
| 725 | ARRDC3      | TNNC1   |
| 726 | TMEM87B     | RFT1    |
| 727 | POLL        | CACNA1D |
| 728 | SAP130      | ACOX2   |
| 729 | LENG1       | THOC7   |
| 730 | F2RL2       | MITF    |
| 731 | OTUD3       | RYBP    |
| 732 | STBD1       | CADM2   |
| 733 | TMEM243     | ARL13B  |
| 734 | BAHD1       | PROS1   |
| 735 | PITPNC1     | RIOX2   |
| 736 | IRF2BPL     | ALCAM   |
| 737 | HHAT        | SIDT1   |
| 738 | CCDC28A     | PHLDB2  |
| 739 | RPS10-NUDT3 | IGSF11  |
| 740 | WDR6        | UPK1B   |
| 741 | PPARD       | B4GALT4 |
| 742 | CD83        | POLQ    |
| 743 | GTF2E2      | HEG1    |
| 744 | RASGRF2     | CHST13  |
| 745 | TUT7        | H1-10   |
| 746 | IFNL1       | MRPL3   |

|     |          |              |
|-----|----------|--------------|
| 747 | RHOC     | AMOTL2       |
| 748 | RHOG     | TM4SF4       |
| 749 | ZC3H12C  | PFN2         |
| 750 | SUGCT    | SUCNR1       |
| 751 | GOLGA6L9 | GFM1         |
| 752 | UBAP1    | TRIM59-IFT80 |
| 753 | HSPA12A  | ECT2         |
| 754 | TVP23C   | ACTL6A       |
| 755 | PARP3    | MCCC1        |
| 756 | PLTP     | PARL         |
| 757 | CASP1    | TRA2B        |
| 758 | SAR1A    | EIF4G1       |
| 759 | ABCA1    | P3H2         |
| 760 | FAM193B  | LPP          |
| 761 | HOMER1   | MB21D2       |
| 762 | MAP3K10  | CLDN1        |
| 763 | CCDC85B  | LETM1        |
| 764 | SLC6A15  | NSD2         |
| 765 | SLC6A17  | STK32B       |
| 766 | RPL26    | AFAP1        |
| 767 | WHAMM    | CC2D2A       |
| 768 | KHNYN    | NCAPG        |
| 769 | ZFYVE1   | KLB          |
| 770 | NXF1     | SHISA3       |
| 771 | COG5     | CEP135       |
| 772 | IER3IP1  | LIMCH1       |
| 773 | APBB1IP  | PAICS        |
| 774 | ST7      | IGFBP7       |
| 775 | ZBTB4    | UGT2B15      |
| 776 | GIGYF1   | YTHDC1       |
| 777 | LURAP1L  | UGT2B11      |
| 778 | CSNK2A2  | SLC4A4       |
| 779 | SCAMP2   | NAAA         |
| 780 | ARNT     | MRPL1        |
| 781 | POM121   | FRAS1        |
| 782 | PHYKPL   | PLAC8        |
| 783 | SMTNL2   | ABCG2        |
| 784 | NPPC     | TIGD2        |
| 785 | CDIP1    | GPRIN3       |
| 786 | TMEM38A  | ARHGAP24     |
| 787 | TMEM150C | MAPK10       |
| 788 | ALKBH7   | BMPR1B       |
| 789 | PCDHAC2  | PDLIM5       |
| 790 | ZUP1     | TRMT10A      |

|     |          |          |
|-----|----------|----------|
| 791 | ITPRIP   | CENPE    |
| 792 | GOLGA80  | GAR1     |
| 793 | ZCHC24   | FAM241A  |
| 794 | CORO1B   | SYNPO2   |
| 795 | DDRKG1   | ANK2     |
| 796 | UAP1     | CCNA2    |
| 797 | TTYH3    | FGF2     |
| 798 | IFNLR1   | PLK4     |
| 799 | SP6      | PGRMC2   |
| 800 | PANK1    | JADE1    |
| 801 | MSX1     | NOCT     |
| 802 | MT1B     | SLC7A11  |
| 803 | SLC8A1   | MAML3    |
| 804 | TANC2    | SCOC     |
| 805 | CTNS     | IL15     |
| 806 | SEC61B   | HHIP     |
| 807 | PCNX2    | FGB      |
| 808 | YBEY     | PLRG1    |
| 809 | FHDC1    | FGA      |
| 810 | ELOVL3   | MND1     |
| 811 | ANGPTL6  | TMEM192  |
| 812 | TP53INP2 | PALLD    |
| 813 | PI4K2A   | GALNT7   |
| 814 | UBA7     | NEIL3    |
| 815 | LONRF3   | WWC2     |
| 816 | SDCBP2   | CLDN22   |
| 817 | IFITM10  | CLPTM1L  |
| 818 | RPL37    | MYO10    |
| 819 | TMEM63B  | CDH6     |
| 820 | PTPDC1   | LMBRD2   |
| 821 | APBA3    | MCIDAS   |
| 822 | NYAP1    | SREK1IP1 |
| 823 | TMEM255B | CENPK    |
| 824 | POPDC3   | CENPH    |
| 825 | MAX      | ERBIN    |
| 826 | FOXO4    | PTCD2    |
| 827 | FYN      | F2R      |
| 828 | TIGD3    | PDE8B    |
| 829 | RPL36A   | ZBED3    |
| 830 | CCDC174  | DHFR     |
| 831 | ZNF761   | XRCC4    |
| 832 | DUSP16   | NR2F1    |
| 833 | C15      | GLRX     |
| 834 | TATDN2   | ST8SIA4  |

|     |          |          |
|-----|----------|----------|
| 835 | CIB1     | GIN1     |
| 836 | EBF4     | MACIR    |
| 837 | HDAC9    | FBXL17   |
| 838 | EIF1B    | FBN2     |
| 839 | IL17RD   | SLC12A2  |
| 840 | EPS8L1   | UQCRQ    |
| 841 | PRAF2    | FSTL4    |
| 842 | PHLDA1   | CDC25C   |
| 843 | CDC37L1  | TGFBI    |
| 844 | KIZ      | CD14     |
| 845 | CDC42EP2 | NR3C1    |
| 846 | USP27X   | RBM27    |
| 847 | TSPAN5   | SYNPO    |
| 848 | PUS3     | GALNT10  |
| 849 | TBC1D25  | SGCD     |
| 850 | KAZN     | UBLCP1   |
| 851 | MICA     | PTTG1    |
| 852 | RHBDL2   | RNF145   |
| 853 | UBE2H    | WWC1     |
| 854 | SUN3     | SLIT3    |
| 855 | ETV6     | DUSP1    |
| 856 | PRR13    | DRD1     |
| 857 | GRB10    | CPEB4    |
| 858 | MSX2     | CPLX2    |
| 859 | TMUB2    | NOP16    |
| 860 | MTMR4    | FGFR4    |
| 861 | SLC39A13 | HNRNPAB  |
| 862 | MTFMT    | TRIM7    |
| 863 | TREM1    | GMDS     |
| 864 | LMOD1    | SERPINB9 |
| 865 | SRXN1    | RPP40    |
| 866 | BTBD10   | PAK1IP1  |
| 867 | HABP4    | TXNDC5   |
| 868 | CHMP3    | ELOVL2   |
| 869 | HECTD3   | EDN1     |
| 870 | SORCS2   | NEDD9    |
| 871 | ZG16B    | RBM24    |
| 872 | CSF2RA   | DCDC2    |
| 873 | RPL28    | GMNN     |
| 874 | RUSC1    | SLC17A1  |
| 875 | MRPL17   | H4C1     |
| 876 | NSMAF    | H3C2     |
| 877 | GRHL3    | HFE      |
| 878 | LYST     | H1-3     |

|     |          |          |
|-----|----------|----------|
| 879 | NGLY1    | NRM      |
| 880 | MSS51    | TCF19    |
| 881 | UBOX5    | DDX39B   |
| 882 | PIP4K2C  | VAR51    |
| 883 | FUT8     | ZBTB12   |
| 884 | SLC22A17 | KIFC1    |
| 885 | UBE2J1   | SPDEF    |
| 886 | MICB     | BLTP3A   |
| 887 | ISL2     | FKBP5    |
| 888 | HLA-G    | KCNK5    |
| 889 | BCL6     | UNC5CL   |
| 890 | ANKRD10  | TFEB     |
| 891 | OLFM1    | BYSL     |
| 892 | MEIS3    | CCND3    |
| 893 | KLK4     | DLK2     |
| 894 | MAP3K3   | CD2AP    |
| 895 | TTC3     | MCM3     |
| 896 | XYLT2    | TMEM14A  |
| 897 | ZNF565   | TRAM2    |
| 898 | CNOT4    | COL21A1  |
| 899 | MCTS2    | FKBP1C   |
| 900 | CLDND1   | KCNQ5    |
| 901 | LRRC8A   | FILIP1   |
| 902 | SLC25A6  | HMG3     |
| 903 | MOCOS    | TTK      |
| 904 | ZNF205   | ME1      |
| 905 | TRAF6    | AKIRIN2  |
| 906 | TMEM184B | NDUFAF4  |
| 907 | ADCY1    | COQ3     |
| 908 | IGDCC4   | PREP     |
| 909 | SPAG9    | RTN4IP1  |
| 910 | GLTP     | GOPC     |
| 911 | PPP1R26  | ASF1A    |
| 912 | RIMS3    | HINT3    |
| 913 | WFS1     | NCOA7    |
| 914 | HEBP2    | ECHDC1   |
| 915 | GCKR     | CENPW    |
| 916 | SCO2     | ARHGAP18 |
| 917 | SDC3     | EPB41L2  |
| 918 | PLEKHA4  | CCN2     |
| 919 | IQCD     | PDE7B    |
| 920 | UQCRB    | BCLAF1   |
| 921 | SRSF5    | PHACTR2  |
| 922 | FAM241B  | ADGRG6   |

|     |           |          |
|-----|-----------|----------|
| 923 | POMGNT2   | UTRN     |
| 924 | YIF1A     | ULBP1    |
| 925 | TBX19     | LRP11    |
| 926 | UBQLN4    | ARMT1    |
| 927 | ZNF526    | AKAP12   |
| 928 | ABCA3     | CNKSR3   |
| 929 | DCDC2C    | ARID1B   |
| 930 | CPSF4     | SLC22A3  |
| 931 | TRADD     | PLG      |
| 932 | PHETA1    | DNAAF5   |
| 933 | RPL11     | MAFK     |
| 934 | EFCAB10   | AIMP2    |
| 935 | RNASEL    | ZNF12    |
| 936 | GOLGA6L10 | RPA3     |
| 937 | VPS18     | THSD7A   |
| 938 | RASA4B    | AGMO     |
| 939 | BIRC3     | POLR1F   |
| 940 | LMO2      | TRA2A    |
| 941 | NCEH1     | CYCS     |
| 942 | SMIM10L2A | ACTB     |
| 943 | SOX4      | CBX3     |
| 944 | SNAP29    | LSM5     |
| 945 | NBPF11    | ANLN     |
| 946 | DAP       | ELMO1    |
| 947 | TMEM115   | DBNL     |
| 948 | ARAP1     | H2AZ2    |
| 949 | TUBGCP6   | DDC      |
| 950 | HSPA4L    | FIGNL1   |
| 951 | YJU2B     | TNS3     |
| 952 | E2F7      | LANCL2   |
| 953 | TMEM170A  | EGFR     |
| 954 | VRK3      | CCT6A    |
| 955 | RMC1      | VKORC1L1 |
| 956 | IGFBP6    | RFC2     |
| 957 | UBE2D4    | GTF2IRD1 |
| 958 | ATP2A1    | CASTOR2  |
| 959 | MRPL34    | GTF2I    |
| 960 | GRHL1     | UPK3B    |
| 961 | TTC39C    | YWHAG    |
| 962 | KRTAP5-1  | PHTF2    |
| 963 | AGAP9     | CACNA2D1 |
| 964 | MED12     | SEMA3E   |
| 965 | LHX3      | SEMA3C   |
| 966 | ZNF436    | FAM133B  |

|      |         |          |
|------|---------|----------|
| 967  | ZBTB42  | CDK6     |
| 968  | NMNAT2  | GNG11    |
| 969  | TBC1D3L | PON3     |
| 970  | ZNF296  | PDK4     |
| 971  | GOLGA8R | SLC25A13 |
| 972  | ZDHHC18 | PON2     |
| 973  | NHLRC4  | PEG10    |
| 974  | UPK3BL2 | ZNF789   |
| 975  | MAMSTR  | MCM7     |
| 976  | DTX3    | NAPEPLD  |
| 977  | PIP4K2A | ORC5     |
| 978  | IRF4    | LAMB1    |
| 979  | IRAK1   | CAV1     |
| 980  | ITSN2   | GPR37    |
| 981  | DGKE    | NDUFA5   |
| 982  | EIF4E2  | HILPDA   |
| 983  | KRTCAP3 | AKR1B10  |
| 984  | EZH1    | LUC7L2   |
| 985  | CSNK1G1 | TMEM139  |
| 986  | TPD52L2 | ZNF467   |
| 987  | ZRANB1  | ABCB8    |
| 988  | SLX1B   | XRCC2    |
| 989  | TNC     | NCAPG2   |
| 990  | RPS6KC1 | AGPAT5   |
| 991  | ALAS1   | PRAG1    |
| 992  | STXBP3  | SGCZ     |
| 993  | GCNA    | FGL1     |
| 994  | BTN2A2  | MTUS1    |
| 995  | GOLGA8Q | HR       |
| 996  | MRPL10  | BMP1     |
| 997  | DENND4C | SLC39A14 |
| 998  | TMED9   | CDCA2    |
| 999  | FANK1   | DPYSL2   |
| 1000 | SLC6A8  | SCARA3   |
| 1001 | PACC1   | PBK      |
| 1002 | RHBDL1  | SCARA5   |
| 1003 | POF1B   | INTS9    |
| 1004 | ZGPAT   | CLU      |
| 1005 | RASD1   | MAK16    |
| 1006 | FOXQ1   | PRKDC    |
| 1007 | ELOVL7  | RGS20    |
| 1008 | TUBG2   | BPNT2    |
| 1009 | BBS2    | ARMC1    |
| 1010 | S1PR2   | VXN      |

|      |          |          |
|------|----------|----------|
| 1011 | WBP4     | NCOA2    |
| 1012 | IL12A    | LACTB2   |
| 1013 | GOLGA6L4 | TRAM1    |
| 1014 | SYF2     | ZC2HC1A  |
| 1015 | SPART    | ASPH     |
| 1016 | ADAMTS12 | OTUD6B   |
| 1017 | STX5     | CDH17    |
| 1018 | TRIM35   | MATN2    |
| 1019 | USP30    | POP1     |
| 1020 | DUSP14   | FBXO43   |
| 1021 | PELO     | UBR5     |
| 1022 | BICD2    | FZD6     |
| 1023 | SALL4    | MED30    |
| 1024 | PAPLN    | DSCC1    |
| 1025 | TBC1D10B | DEPTOR   |
| 1026 | TAF1A    | RAD21    |
| 1027 | SPINDOC  | SNTB1    |
| 1028 | HOXC13   | ZHX1     |
| 1029 | COL11A2  | ATAD2    |
| 1030 | FAM83G   | ANXA13   |
| 1031 | MEA1     | MYC      |
| 1032 | AK3      | CYRIB    |
| 1033 | ARL8A    | PHF20L1  |
| 1034 | PFDN6    | CHRAC1   |
| 1035 | ZNF267   | GPR20    |
| 1036 | ATP6V1E1 | PYCR3    |
| 1037 | APOBEC3H | HGH1     |
| 1038 | EIF4EBP2 | BOP1     |
| 1039 | SLX1A    | TONSL    |
| 1040 | TBC1D3F  | MFSD3    |
| 1041 | AP1G2    | RECQL4   |
| 1042 | STAM     | ARHGAP39 |
| 1043 | CCDC82   | INSL4    |
| 1044 | DDX3Y    | GLDC     |
| 1045 | REM2     | NFIB     |
| 1046 | TMEM38B  | MLLT3    |
| 1047 | USP48    | MOB3B    |
| 1048 | TCEA3    | KIF24    |
| 1049 | LIX1L    | PIGO     |
| 1050 | KLC2     | CA9      |
| 1051 | OSBPL6   | RUSC2    |
| 1052 | PSORS1C2 | MELK     |
| 1053 | ZBTB43   | CNTNAP3B |
| 1054 | CNPY3    | CNTNAP3C |

|      |          |           |
|------|----------|-----------|
| 1055 | RAB12    | PCSK5     |
| 1056 | SCAND1   | PSAT1     |
| 1057 | TNFSF14  | FRMD3     |
| 1058 | KXD1     | RMI1      |
| 1059 | WFDC5    | AGTPBP1   |
| 1060 | ZNF579   | DAPK1     |
| 1061 | MOCS2    | CKS2      |
| 1062 | KLF6     | FAM120A   |
| 1063 | STX6     | PTCH1     |
| 1064 | RAPGEF3  | ZNF367    |
| 1065 | AHCYL2   | FOXE1     |
| 1066 | CTC1     | NR4A3     |
| 1067 | CFAP74   | NIPSNAP3A |
| 1068 | ABCC5    | SMC2      |
| 1069 | SRGAP2B  | CTNNA1    |
| 1070 | ELOB     | SVEP1     |
| 1071 | PEL1     | GNG10     |
| 1072 | ATL1     | POLE3     |
| 1073 | APLP2    | ZNF618    |
| 1074 | TMEM184C | PHF19     |
| 1075 | ABCG4    | B3GALT9   |
| 1076 | DYNLT1   | C5        |
| 1077 | BAIAP2   | TLL1      |
| 1078 | WIPF3    | DENND1A   |
| 1079 | RBBP5    | NEK6      |
| 1080 | HIC2     | RABEPK    |
| 1081 | ASPHD2   | PKN3      |
| 1082 | PLAA     | ENDOG     |
| 1083 | MORF4L1  | DYNC2I2   |
| 1084 | EXOC1    | PTPA      |
| 1085 | BRAP     | IER5L     |
| 1086 | TRIM45   | ABL1      |
| 1087 | ZNF354A  | PRRT1B    |
| 1088 | CHMP4B   | ENTPD2    |
| 1089 | ZNF2     | SAPCD2    |
| 1090 | ATF4     | PLCXD1    |
| 1091 | DAB2IP   | ZBED1     |
| 1092 | FILIP1L  | GYG2      |
| 1093 | TFG      | ARSL      |
| 1094 | MFSD13A  | CLCN4     |
| 1095 | TTL      | WWC3      |
| 1096 | STAM2    | MID1      |
| 1097 | MAFG     | CLTRN     |
| 1098 | PPM1N    | NHS       |

|      |          |          |
|------|----------|----------|
| 1099 | MOGS     | ADGRG2   |
| 1100 | NRBP1    | EIF1AX   |
| 1101 | TBC1D3I  | MBTPS2   |
| 1102 | CHRM4    | YY2      |
| 1103 | GOLGA8H  | CNKS2R   |
| 1104 | POLR3GL  | SYTL5    |
| 1105 | CHRNA3   | BCOR     |
| 1106 | XPNPEP1  | SUV39H1  |
| 1107 | LAMP2    | HSD17B10 |
| 1108 | MAPKAP1  | SMC1A    |
| 1109 | SPAG4    | SPIN4    |
| 1110 | FGR      | AR       |
| 1111 | ZNF280A  | KIF4A    |
| 1112 | LSM12    | ERCC6L   |
| 1113 | KCNG1    | TAF9B    |
| 1114 | WFDC2    | CENPI    |
| 1115 | ANKFN1   | HNRNPH2  |
| 1116 | TUBAL3   | PGK1     |
| 1117 | GPR50    | TMSB15C  |
| 1118 | SS18L1   | TMSB15B  |
| 1119 | GOLGA8N  | CLDN2    |
| 1120 | HIPK4    | NUP62CL  |
| 1121 | GJA3     | SLC25A43 |
| 1122 | SLC45A3  | PLS3     |
| 1123 | TANK     | BRCC3    |
| 1124 | MAST3    | VBP1     |
| 1125 | MKNK2    | G6PD     |
| 1126 | APOBEC3D |          |
| 1127 | PLIN3    |          |
| 1128 | CCDC117  |          |
| 1129 | RPL38    |          |
| 1130 | PRDM10   |          |
| 1131 | TBK1     |          |
| 1132 | KCNQ3    |          |
| 1133 | ZNF554   |          |
| 1134 | NIPAL3   |          |
| 1135 | CCDC60   |          |
| 1136 | KIF3A    |          |
| 1137 | CBARP    |          |
| 1138 | VNN1     |          |
| 1139 | MAPRE1   |          |
| 1140 | FAM120B  |          |
| 1141 | ZNF768   |          |
| 1142 | RASA4    |          |

|      |         |  |
|------|---------|--|
| 1143 | PREX1   |  |
| 1144 | CLEC11A |  |
| 1145 | PARP4   |  |
| 1146 | SYN2    |  |
| 1147 | RENBP   |  |
| 1148 | MRPS21  |  |
| 1149 | DLG2    |  |
| 1150 | ZNF18   |  |
| 1151 | AMZ2    |  |
| 1152 | SH3GLB1 |  |
| 1153 | APAF1   |  |
| 1154 | MAPK7   |  |
| 1155 | SPRY1   |  |
| 1156 | CXXC1   |  |
| 1157 | MTX1    |  |
